# Supplementary material
Source: MDPI journal article supplement (https://www.mdpi.com/2073-4441/16/10/1372)
Supplement: s1 [file s1]

## Supporting Information

### Enhanced Photocatalytic Degradation of Tetracycline by Magnetically Separable g-C<sub>3</sub>N<sub>4</sub> Doped Magnetite@Titanium Dioxide Heterostructured Photocatalyst

Rong Liu<sup>1</sup>, Mingming Li<sup>1</sup>, Jie Chen<sup>1,2,\*</sup>, Yu Yin<sup>1</sup>, Wei Zhao<sup>1</sup>, Zhanghao Gong<sup>1</sup>, Hua Jin<sup>2</sup> and Zhigang Liu<sup>2</sup>

1. School of Chemistry and Pharmaceutical Engineering, Jilin Institute of Chemical Technology, Jilin 132022, China; liurong0418@126.com(R.L.); limm0123@126.com(M.L.); yinyu@jlicet.edu.cn(Y.Y.); zhaowei21@jlicet.edu.cn(W.Z.); gongzhanghao@jlicet.edu.cn(Z.G.).

2. Center of Characterization and Analysis, Jilin Institute of Chemical Technology, Jilin 132022, China; chenjie1@jlicet.edu.cn(J.C.); yijun@jlicet.edu.cn(H.J.); lzg@jlicet.edu.cn(Z.L.).

\* Correspondence: chenjie1@jlicet.edu.cn

### Supplemental Figures

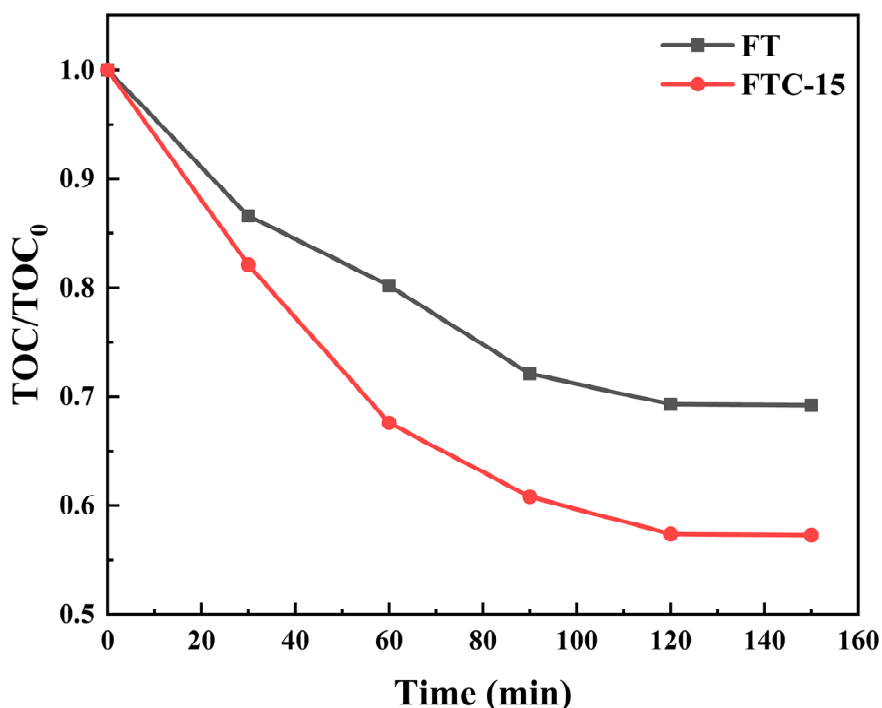

Figure S1 Removal rate of TOC by FT and FTC-15 samples
